# Supplementary material for: Cross-modality imaging of bisphosphonate-treated murine jawbones
Source: Royal Society of Chemistry journal article supplement (doi:10.1039/d0an02373f), 2021-01-01
Supplement: d0an02373f1.pdf [file d0an02373f1.pdf]

## Supplementary

**Table S1. Results of ANOVA and Kruskal-Wallis-Tests. Significant p-values are bold.**

| Modality                 |            | Df | Sum Sq                     | Mean Sq   | F-value | p-value        |
|--------------------------|------------|----|----------------------------|-----------|---------|----------------|
| Calcium                  | Treatments | 3  | 1.52E+09                   | 507252940 | 1.095   | 0.38           |
|                          | Residuals  | 16 | 7.41E+09                   | 463286721 |         |                |
| Phosphorus               | Treatments | 3  | 9.07E+07                   | 30215264  | 0.232   | 0.873          |
|                          | Residuals  | 16 | 2.08E+09                   | 130244910 |         |                |
| Young's modulus          | Treatments | 3  | 0.3691                     | 0.123     | 0.798   | 0.529          |
|                          | Residuals  | 8  | 1.2326                     | 0.1541    |         |                |
| BV/TV                    | Treatments | 3  | 27.1                       | 9.033     | 0.782   | 0.518          |
|                          | Residuals  | 20 | 231.1                      | 11.555    |         |                |
| Bone-to-enamel distances | Treatments | 3  | 1175380                    | 391793    | 10.86   | <b>0.00341</b> |
|                          | Residuals  | 8  | 288605                     | 36076     |         |                |
|                          |            | Df | Kruskal-Wallis chi-squared |           | p-value |                |
| Zinc                     |            | 3  | 3.3469                     |           |         | 0.3412         |
| Ø Microfracture size     |            | 3  | 1.8901                     |           |         | 0.5955         |
| Microfracture density    |            | 3  | 3.4286                     |           |         | 0.3301         |
| Pore thickness           |            | 3  | 10.329                     |           |         | <b>0.01597</b> |

**Table S2. Correlation coefficients corresponding to Figure 9.**

|                                 | <b>BV/TV</b> | <b>Pore thickness</b> | <b>Bone-to-enamel distances</b> | <b>Calcium</b> | <b>Phosphor</b> | <b>Zinc</b> | <b>Ø Microfracture size</b> | <b>Microfracture density</b> | <b>Young's modulus</b> |
|---------------------------------|--------------|-----------------------|---------------------------------|----------------|-----------------|-------------|-----------------------------|------------------------------|------------------------|
| <b>BV/TV</b>                    | 1.000        | 0.699                 | -0.291                          | 0.011          | -0.134          | 0.197       | -0.349                      | 0.009                        | -0.484                 |
| <b>Pore thickness</b>           | -0.699       | 1.000                 | 0.528                           | -0.218         | 0.026           | -0.424      | 0.423                       | 0.024                        | 0.511                  |
| <b>Bone-to-enamel distances</b> | -0.291       | 0.528                 | 1.000                           | 0.044          | 0.292           | 0.157       | 0.874                       | -0.375                       | -0.146                 |
| <b>Calcium</b>                  | 0.011        | 0.218                 | 0.044                           | 1.000          | 0.851           | 0.847       | -0.219                      | -0.200                       | -0.344                 |
| <b>Phosphorus</b>               | -0.134       | 0.026                 | 0.292                           | 0.851          | 1.000           | 0.584       | -0.135                      | -0.240                       | -0.196                 |
| <b>Zinc</b>                     | 0.197        | 0.424                 | 0.157                           | 0.847          | 0.584           | 1.000       | -0.201                      | -0.213                       | -0.453                 |
| <b>Ø Microfracture size</b>     | -0.349       | 0.423                 | 0.874                           | -0.219         | -0.135          | -0.201      | 1.000                       | -0.310                       | 0.703                  |
| <b>Microfracture density</b>    | 0.009        | 0.024                 | -0.375                          | -0.200         | -0.240          | -0.213      | -0.310                      | 1.000                        | -0.302                 |
| <b>Young's modulus</b>          | -0.484       | 0.511                 | -0.146                          | -0.344         | -0.196          | -0.453      | 0.703                       | -0.302                       | 1.000                  |
